# Supplementary material for: Subphenotypes in Patients with Septic Shock Receiving Vitamin C, Hydrocortisone, and Thiamine: A Retrospective Cohort Analysis
Source: PubMed Central journal article supplement (PMC6950320; doi:10.3390/nu11122976), 2019-12-05
Supplement: nutrients-11-02976-s001.pdf [file nutrients-11-02976-s001.pdf]

**Table S1.** Pre-vitamin C protocol characteristics of the patients who died within 24 h of receiving protocol.

| Variable                                       | Total<br>(n = 7)  |
|------------------------------------------------|-------------------|
| Age, years                                     | 83 (70–86)        |
| Male sex                                       | 3 (43)            |
| Body mass index, kg/m <sup>2</sup>             | 21.3 (19.0–24.8)  |
| Comorbidities                                  |                   |
| Diabetes                                       | 3 (43)            |
| Chronic heart failure                          | 0                 |
| Chronic neurologic disease                     | 0                 |
| Chronic lung disease                           | 2 (29)            |
| Liver cirrhosis                                | 0                 |
| Chronic kidney disease                         | 4 (57)            |
| Malignancy                                     | 3 (43)            |
| Immunocompromised                              | 3 (43)            |
| Nosocomial infection                           | 5 (71)            |
| Cause of sepsis                                |                   |
| Pneumonia                                      | 2 (29)            |
| Urosepsis                                      | 2 (29)            |
| Gastrointestinal/biliary                       | 4 (57)            |
| Skin/soft tissue                               | 0                 |
| Concurrent bacteremia                          | 2 (29)            |
| ARDS at ICU admission                          | 0                 |
| APACHE II score                                | 39 (37–43)        |
| SOFA score                                     | 14 (13–16)        |
| Mechanical ventilation                         | 7 (100)           |
| Neuromuscular blocker                          | 0                 |
| Renal replacement therapy                      | 6 (86)            |
| Vital signs & laboratory data                  |                   |
| Body temperature, °C                           | 36.9 (36.3–37.9)  |
| Mean arterial pressure, mmHg                   | 40 (30–43)        |
| Respiratory rate, breaths/min                  | 30 (28–32)        |
| PaO <sub>2</sub> /FiO <sub>2</sub>             | 238 (181–339)     |
| Bicarbonate, mEq/L                             | 12.2 (11.8–13.5)  |
| Creatinine, mg/dL                              | 3.5 (1.8–3.8)     |
| White cell count, 1000/mm <sup>3</sup>         | 20.0 (13.9–25.6)  |
| Total bilirubin, mg/dL                         | 0.8 (0.6–0.8)     |
| C-reactive protein, mg/L                       | 105 (74–133)      |
| Lactate, mmol/L                                | 17.0 (8.4–20.0)   |
| Norepi eq dose, ug/min                         | 42.9 (32.6–62.7)  |
| Vasoactive-inotropic score                     | 81.4 (63.6–138.0) |
| Day 1 net fluid retention <sup>1</sup> , mL    | 2969 (2752–4005)  |
| Time from shock onset to vitamin C protocol, h | 7 (4–12)          |

The data are presented as median (interquartile range) or number (percentage). ARDS: acute respiratory distress syndrome; ICU: intensive care unit; APACHE: Acute Physiology and Chronic Health Evaluation; SOFA: Sequential Organ Failure Assessment; PaO<sub>2</sub>: arterial partial pressure of oxygen; FiO<sub>2</sub>: fraction of inspired oxygen; Norepi eq: norepinephrine equivalent. <sup>1</sup> The net fluid retention was determined as the difference between intake and output of all fluids (urine volume, dialysis volume, drainage volume, and stool weight).

**Table S2.** Change in physiological variables in the study groups.

| Variable                               | Group A<br>(n = 27) | Group B<br>(n = 30) | Group C<br>(n = 35) | Group D<br>(n = 35) | P      |
|----------------------------------------|---------------------|---------------------|---------------------|---------------------|--------|
| <b>Absolute value</b>                  |                     |                     |                     |                     |        |
| Norepi eq dose, ug/min                 |                     |                     |                     |                     |        |
| Baseline                               | 16.0 (10.2–19.1)    | 14.9 (10.4–21.1)    | 16.0 (9.6–28.3)     | 14.8 (6.5–20.7)     | 0.70   |
| 3 h                                    | 13.1 (6.9–19.4)     | 14.4 (10.5–24.8)    | 16.1 (9.5–22.4)     | 10.7 (7.3–22.1)     | 0.72   |
| 6 h                                    | 10.8 (4.4–19.1)     | 14.2 (9.5–24.6)     | 14.0 (6.9–27.9)     | 10.8 (5.2–21.6)     | 0.46   |
| 12 h                                   | 7.2 (2.9–13.0)      | 10.5 (6.6–18.0)     | 10.5 (4.1–20.5)     | 7.9 (2.1–22.1)      | 0.37   |
| 24 h                                   | 5.4 (0–9.1)         | 6.1 (2.1–12.0)      | 4.1 (0.5–16.9)      | 4.0 (0–20.1)        | 0.61   |
| Vasoactive-inotropic score             |                     |                     |                     |                     |        |
| Baseline                               | 32.0 (21.6–48.1)    | 25.9 (17.0–45.6)    | 38.0 (18.9–50.6)    | 27.0 (13.5–49.3)    | 0.71   |
| 3 h                                    | 28.0 (16.1–43.6)    | 27.0 (19.0–48.1)    | 35.0 (18.4–53.8)    | 31.5 (13.0–52.4)    | 0.93   |
| 6 h                                    | 19.7 (11.0–39.9)    | 29.2 (17.0–46.0)    | 33.7 (13.4–57.2)    | 25.3 (10.0–62.7)    | 0.62   |
| 12 h                                   | 16.1 (5.9–32.4)     | 22.9 (15.3–38.1)    | 25.0 (12.0–51.2)    | 20.0 (5.0–57.0)     | 0.46   |
| 24 h                                   | 8.0 (0–20.0)        | 11.7 (5.8–24.0)     | 8.3 (3.3–41.3)      | 9.7 (2.0–50.6)      | 0.42   |
| Day 2 (n = 27/30/35/34) <sup>1</sup>   |                     |                     |                     |                     |        |
| Vasopressor use                        | 25 (93)             | 28 (93)             | 34 (97)             | 32 (94)             | 0.88   |
| Mean arterial pressure, mmHg           | 62 (57–67)          | 64 (60–68)          | 62 (55–68)          | 64 (52–68)          | 0.90   |
| PaO <sub>2</sub> /FiO <sub>2</sub>     | 248 (167–314)       | 217 (149–254)       | 219 (162–333)       | 227 (150–369)       | 0.79   |
| Creatinine, mg/dL                      | 1.1 (0.7–1.8)       | 1.3 (1.0–2.2)       | 1.3 (0.7–1.8)       | 1.2 (0.6–2.0)       | 0.54   |
| White cell count, 1000/mm <sup>3</sup> | 20.7 (16.2–32.3)    | 12.0 (8.0–15.8)     | 20.7 (15.9–26.7)    | 8.3 (4.4–13.5)      | <0.001 |
| Total bilirubin, mg/dL                 | 0.7 (0.4–1.6)       | 1.0 (0.5–2.4)       | 0.8 (0.5–1.9)       | 0.8 (0.5–2.3)       | 0.41   |
| C-reactive protein, mg/L               | 233 (130–279)       | 254 (194–317)       | 163 (120–287)       | 146 (100–247)       | 0.009  |
| Lactate, mmol/L                        | 2.7 (2.0–4.4)       | 4.4 (2.1–9.2)       | 2.7 (1.8–6.8)       | 3.9 (2.2–6.0)       | 0.40   |
| SOFA score                             | 10 (9–13)           | 12 (9–14)           | 11 (10–14)          | 12 (9–16)           | 0.33   |
| Day 3 (n = 27/25/31/29) <sup>2</sup>   |                     |                     |                     |                     |        |
| Vasopressor use                        | 16 (59)             | 16 (64)             | 25 (81)             | 22 (76)             | 0.25   |
| Mean arterial pressure, mmHg           | 62 (55–74)          | 66 (57–72)          | 64 (60–72)          | 60 (53–72)          | 0.78   |
| PaO <sub>2</sub> /FiO <sub>2</sub>     | 286 (223–354)       | 236 (194–282)       | 197 (170–321)       | 297 (184–382)       | 0.27   |
| Creatinine, mg/dL                      | 1.0 (0.6–1.8)       | 1.2 (0.8–1.6)       | 1.2 (0.6–1.4)       | 0.9 (0.5–2.2)       | 0.84   |
| White cell count, 1000/mm <sup>3</sup> | 18.7 (12.5–36.4)    | 12.6 (8.9–18.3)     | 18.5 (13.9–24.0)    | 9.7 (6.5–12.9)      | <0.001 |

|                                           |                  |                 |                  |                 |        |
|-------------------------------------------|------------------|-----------------|------------------|-----------------|--------|
| Total bilirubin, mg/dL                    | 0.6 (0.4–1.5)    | 0.7 (0.5–2.4)   | 0.8 (0.5–1.7)    | 1.0 (0.5–2.4)   | 0.35   |
| C-reactive protein, mg/L                  | 137 (74–258)     | 215 (150–282)   | 174 (87–232)     | 135 (68–233)    | 0.11   |
| Lactate, mmol/L                           | 2.3 (1.8–3.0)    | 2.2 (1.7–4.2)   | 2.2 (1.8–4.3)    | 3.0 (2.3–3.5)   | 0.44   |
| SOFA score                                | 10 (5–12)        | 9 (7–12)        | 11 (8–13)        | 11 (8–15)       | 0.16   |
| Day 4 (n = 27/23/25/25) <sup>3</sup>      |                  |                 |                  |                 |        |
| Vasopressor use                           | 11 (41)          | 11 (48)         | 13 (52)          | 15 (60)         | 0.57   |
| Mean arterial pressure, mmHg              | 72 (59–77)       | 68 (62–73)      | 66 (60–74)       | 63 (54–73)      | 0.50   |
| PaO <sub>2</sub> /FiO <sub>2</sub>        | 270 (171–319)    | 231 (183–263)   | 225 (167–311)    | 311 (198–364)   | 0.12   |
| Creatinine, mg/dL                         | 0.8 (0.5–1.6)    | 1.1 (0.7–1.2)   | 0.9 (0.5–1.2)    | 0.7 (0.6–1.8)   | 0.83   |
| White cell count, 1000/mm <sup>3</sup>    | 15.8 (13.1–27.8) | 12.0 (8.4–15.0) | 16.1 (12.3–18.1) | 8.4 (6.5–13.2)  | <0.001 |
| Total bilirubin, mg/dL                    | 0.6 (0.4–1.4)    | 0.9 (0.4–1.9)   | 0.8 (0.5–1.6)    | 0.8 (0.5–3.0)   | 0.55   |
| C-reactive protein, mg/L                  | 63 (38–155)      | 127 (85–174)    | 85 (42–154)      | 76 (42–188)     | 0.27   |
| Lactate, mmol/L                           | 1.9 (1.5–2.9)    | 2.8 (1.6–4.1)   | 2.0 (1.7–2.4)    | 2.6 (1.8–3.7)   | 0.29   |
| SOFA score                                | 8 (6–11)         | 10 (6–13)       | 10 (5–12)        | 10 (7–14)       | 0.32   |
| <b>Change relative to baseline values</b> |                  |                 |                  |                 |        |
| SOFA score, day 4                         | 4 (1–5)          | 3 (0–5)         | 4 (1–7)          | 1 (0–3)         | 0.80   |
| Lactate, day 4                            | 1.9 (0.2–5.4)    | 0.7 (-0.8–2.0)  | 1.7 (0.4–3.9)    | 1.2 (-0.1–4.0)  | 0.051  |
| Norepi eq dose, 24 h                      | 10.6 (7.0–15.0)  | 8.1 (2.1–13.6)  | 5.4 (1.4–14.0)   | 5.5 (1.3–10.5)  | 0.16   |
| Vasoactive-inotropic score, 24 h          | 21.1 (12.0–33.0) | 11.9 (2.7–22.3) | 9.0 (3.9–34.0)   | 12.0 (0.9–21.0) | 0.01   |

The data are presented as median (interquartile range) or number (percentage). Norepi eq: norepinephrine equivalent; PaO<sub>2</sub>: arterial partial pressure of oxygen; FiO<sub>2</sub>: fraction of inspired oxygen; SOFA: Sequential Organ Failure Assessment. <sup>1</sup> No. of patients was 27 for Group A, 30 for Group B, 35 for Group C, and 34 for Group D. <sup>2</sup> No. of patients was 27 for Group A, 25 for Group B, 31 for Group C, and 29 for Group D. <sup>3</sup> No. of patients was 27 for Group A, 23 for Group B, 25 for Group C, and 25 for Group D.

**Table S3.** Clinical characteristics including echocardiographic findings of 22 patients with septic cardiomyopathy.

| Group | Age / sex | Cause of sepsis                | Norepi eq dose, µg/min | VIS | Echocardiographic findings                                | Echo improved | Vasopressor weaning | ICU mortality |
|-------|-----------|--------------------------------|------------------------|-----|-----------------------------------------------------------|---------------|---------------------|---------------|
| A     | 69 / M    | Pneumonia                      | 14.0                   | 47  | Severe LV systolic dysfunction                            | N/A           | Yes                 | No            |
| A     | 95 / M    | Urosepsis                      | 77.1                   | 121 | Moderate LV systolic dysfunction, RV systolic dysfunction | Yes           | Yes                 | No            |
| A     | 73 / M    | Pneumonia                      | 19.2                   | 52  | Severe LV systolic dysfunction                            | No            | No                  | Yes           |
| A     | 70 / F    | Gastrointestinal               | 18.0                   | 47  | Moderate LV systolic dysfunction, RV systolic dysfunction | N/A           | Yes                 | No            |
| A     | 74 / M    | CRBSI                          | 16.2                   | 32  | Mild LV systolic dysfunction                              | N/A           | Yes                 | No            |
| A     | 78 / M    | Gastrointestinal               | 20.3                   | 40  | Severe LV systolic dysfunction                            | Yes           | Yes                 | No            |
| A     | 77 / M    | Undetermined                   | 20.1                   | 50  | Mild LV systolic dysfunction                              | N/A           | Yes                 | No            |
| B     | 59 / F    | Pneumonia                      | 1.5                    | 3   | Moderate LV systolic dysfunction                          | Yes           | Yes                 | No            |
| B     | 76 / F    | Urosepsis                      | 28.8                   | 42  | Mild LV systolic dysfunction                              | Yes           | Yes                 | No            |
| B     | 84 / M    | Gastrointestinal               | 10.5                   | 14  | Severe LV systolic dysfunction                            | N/A           | No                  | Yes           |
| B     | 72 / M    | Gastrointestinal               | 10.4                   | 17  | Moderate LV systolic dysfunction                          | N/A           | Yes                 | No            |
| B     | 74 / M    | Pneumonia,<br>Skin/soft tissue | 10.4                   | 19  | Mild LV systolic dysfunction                              | N/A           | No                  | Yes           |
| B     | 83 / M    | Pneumonia                      | 11.6                   | 21  | Moderate LV systolic dysfunction                          | Yes           | Yes                 | No            |
| C     | 70 / M    | Pneumonia                      | 42.7                   | 76  | Severe LV systolic dysfunction, RV systolic dysfunction   | N/A           | No                  | Yes           |
| C     | 48 / M    | Pneumonia                      | 16.0                   | 31  | Mild LV systolic dysfunction                              | Yes           | Yes                 | No            |
| C     | 58 / M    | Skin/soft tissue               | 162.5                  | 262 | Severe LV systolic dysfunction                            | Yes           | Yes                 | No            |
| C     | 39 / M    | Gastrointestinal               | 31.8                   | 58  | Mild LV systolic dysfunction                              | N/A           | Yes                 | No            |
| C     | 86 / F    | Pneumonia                      | 21.2                   | 53  | Moderate LV systolic dysfunction                          | N/A           | No                  | Yes           |
| C     | 58 / M    | Gastrointestinal               | 31.8                   | 76  | Moderate LV systolic dysfunction                          | N/A           | No                  | Yes           |
| D     | 85 / M    | Pneumonia                      | 32.0                   | 70  | Mild LV systolic dysfunction                              | N/A           | No                  | Yes           |
| D     | 91 / F    | Pneumonia                      | 10.8                   | 24  | Mild LV systolic dysfunction                              | N/A           | Yes                 | No            |
| D     | 86 / M    | Pneumonia                      | 53.6                   | 84  | Mild LV systolic dysfunction                              | N/A           | No                  | Yes           |

Norepi eq: norepinephrine equivalent; VIS: vasoactive-inotropic score; ICU: intensive care unit; LV: left ventricular; N/A: not available; RV: right ventricular; CRBSI: catheter-related bloodstream infection.
